# Supplementary material for: Evaluating coral trophic strategies using fatty acid composition and indices
Source: PLoS One. 2019 Sep 11;14(9):e0222327. doi: 10.1371/journal.pone.0222327 (PMC6739055; doi:10.1371/journal.pone.0222327)
Supplement: S1 Table — Geographic coordinates. (XLSX) [file pone.0222327.s001.xlsx]

## Sheet: Sheet1
Atoll	Site	Latitude	Longitude
Dhaalu	Hulhuvehi	2.862	73.029
Dhaalu	Maafushi	2.683	72.847
Meemu	Bodu Hura	2.811	73.366
Meemu	Kurali	2.782	73.369
Meemu	Veyvah	2.975	73.62
North Ari	Dinoluga	4.151	72.732
South Ari	Dhiggaru Falhu	3.714	72.981
South Male	Fushidiggaru Falhu	4.079	73.539
Vaavu	Kandimma Falhu	3.42	73.375
Vaavu	Medhu Faru	3.626	73.509
